# Supplementary material for: Elevated endotoxin levels in non-alcoholic fatty liver disease
Source: Springer Nature journal article supplement (doi:10.1186/1476-9255-7-15), 2010-01-01

Figure 4

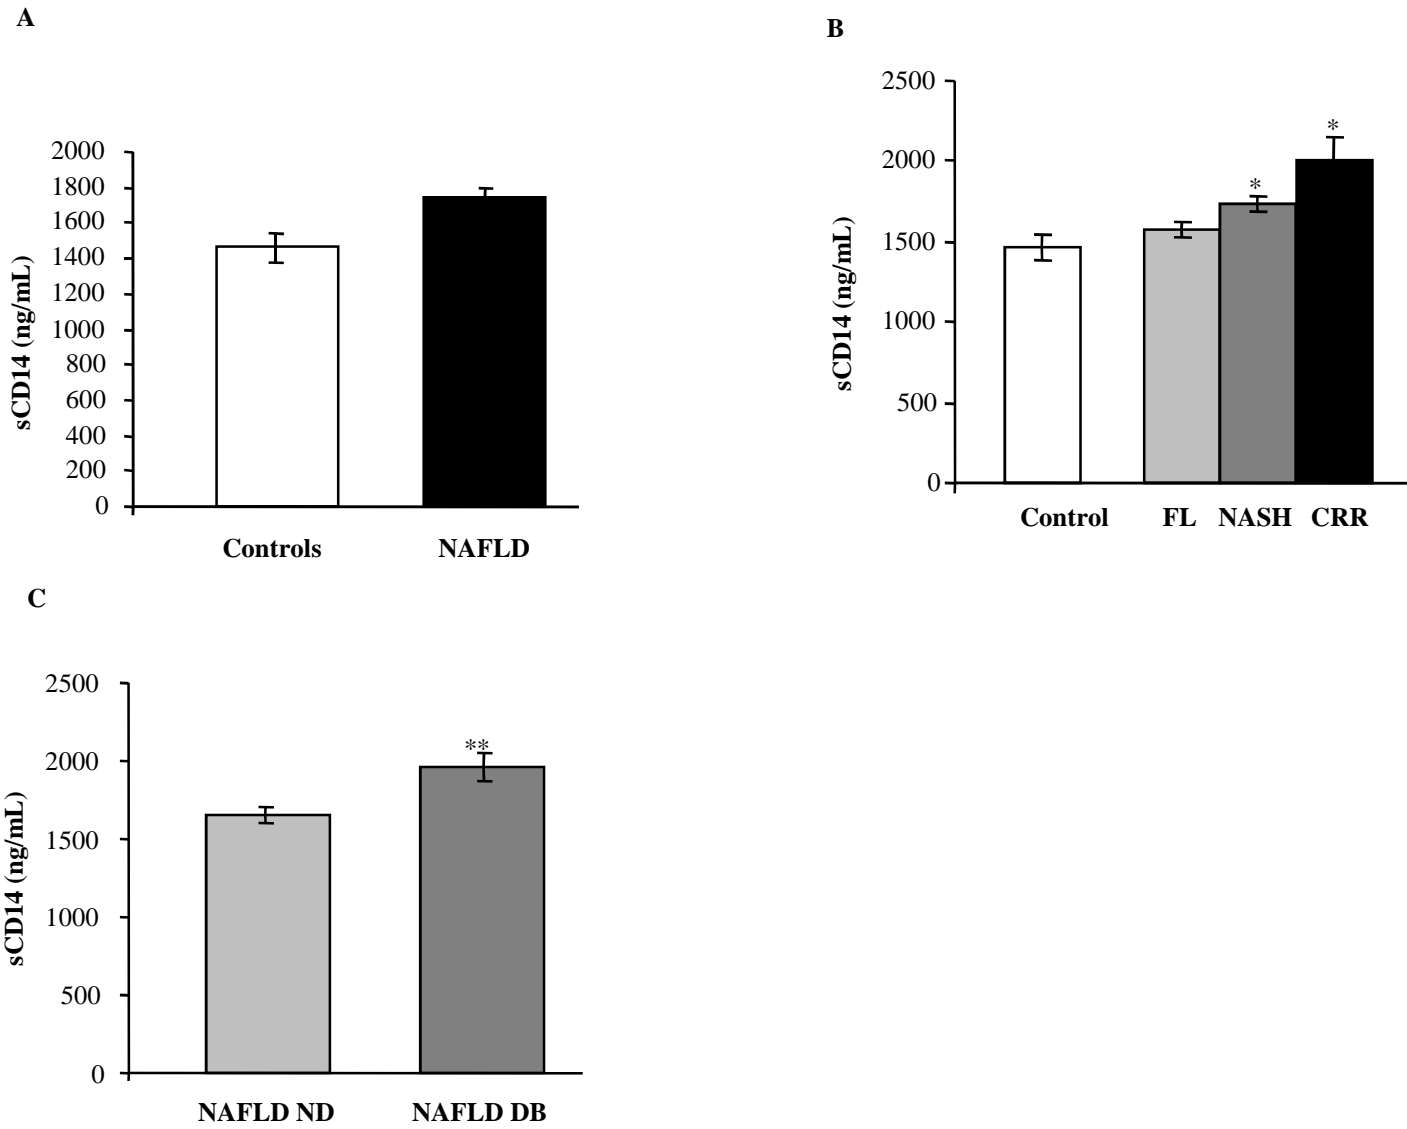

Supplement: 12950_2009_134_MOESM4_ESM.pdf [file 12950_2009_134_MOESM4_ESM.pdf]
